# Supplementary material
Source: Springer Nature journal article supplement (https://www.springermedizin.de/resource/supplementary/12993_2012_416_MOESM4_ESM.pdf/9617710)

**(A)**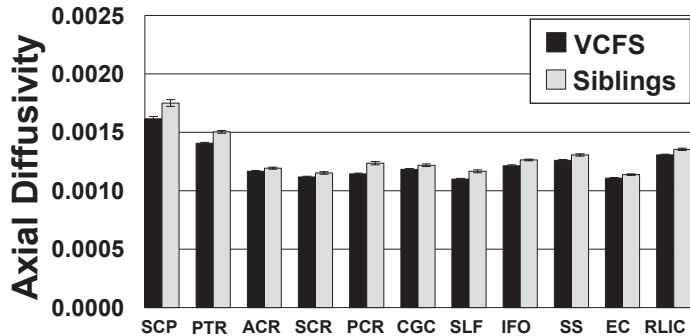**(B)**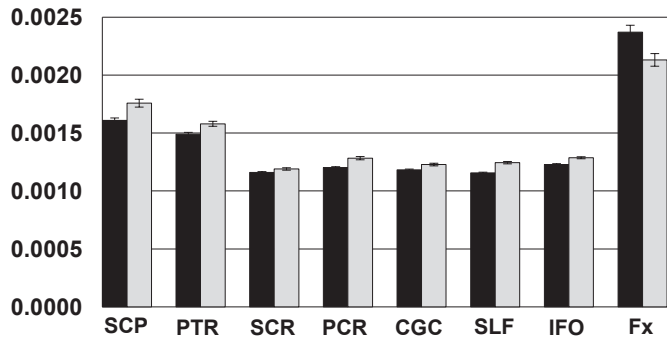

Supplement: MOESM4 [file 9617710]
